# Supplementary material
Source: HighWire-hosted journal article supplement (http://jmg.bmj.com/highwire/filestream/160403/field_highwire_adjunct_files/0/JMG_SupTab1_088310.xls)
Supplement: JMG_SupTab1_088310.xls [file JMG_SupTab1_088310.xls]

## Sheet: Study sample characteristics
	Table 1: Characteristics of your analyzed study sample (as used for the SNP association analyses)
	Study	Sample Size	Women % (n)	Age (years)	Mean of age (+/-sd)
	Carlantino Project	960	0.6	19-92	50.4(16.3)
	Friuli Venezia Giulia Project	265	0.6	18-90	51.71(16.4)
	Korcula Project	804	0.633	18-98	56.3(13.7)
	Split Project	496	0.56	18-79	49.0(14.6)
	Cilento project	421	0.566667	18-91	56.3 (17.6)
	Talana Project	470	0.59	18-92	50.82(18.49)
